# Supplementary material
Source: PubMed Central journal article supplement (PMC1693697)

(a)

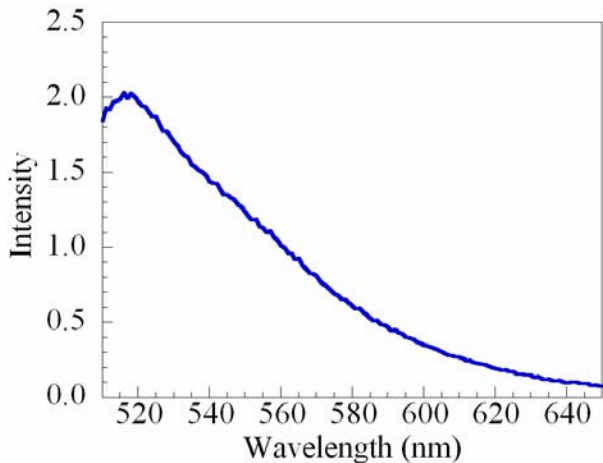

(b)

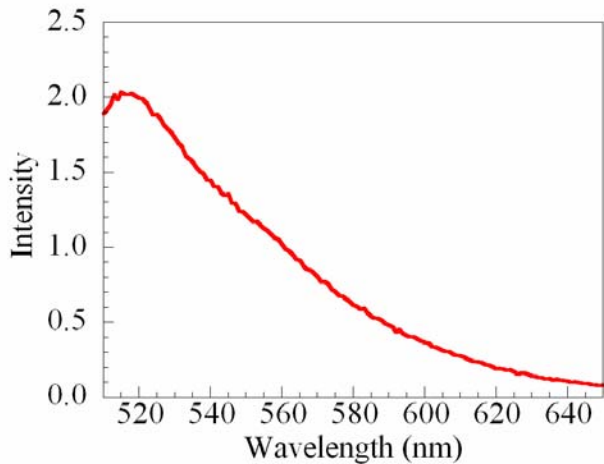

Supplement: pnas_0605960103_1.pdf [file pnas_0605960103_1.pdf]

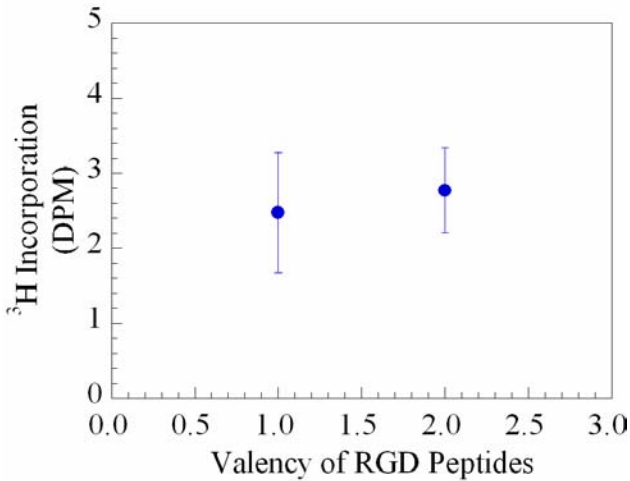

Supplement: pnas_0605960103_2.pdf [file pnas_0605960103_2.pdf]
